# Supplementary material for: Ethylenediaminetetraacetic Acid Disodium Salt Acts as an Antifungal Candidate Molecule against Fusarium graminearum by Inhibiting DON Biosynthesis and Chitin Synthase Activity
Source: PubMed Central journal article supplement (PMC7823441; doi:10.3390/toxins13010017), 2020-12-27
Supplement: toxins-13-00017-s001.pdf [file toxins-13-00017-s001.pdf]

# Supplementary Materials: Ethylenediaminetetraacetic Acid Disodium Salt Acts as an Antifungal Candidate Molecule against *Fusarium graminearum* by Inhibiting DON Biosynthesis and Chitin Synthase Activity

Xiu-Shi Song, Kai-Xin Gu, Jing Gao, Jian-Xin Wang, Shao-Chen Ding and Mingguo Zhou

**Table S1.** Minimum inhibitory concentrations of EDTANa<sub>2</sub>.

| Isolates                          | MIC (mM) |
|-----------------------------------|----------|
| <i>F. acuminatum</i>              | 18.75    |
| <i>F. asiaticum</i>               | 9.37     |
| <i>F. avenaceum</i>               | 9.37     |
| <i>F. concentricum</i>            | 18.75    |
| <i>F. culmorum</i>                | 18.75    |
| <i>F. equiseti</i>                | 9.37     |
| <i>F. fujikuroi</i>               | 9.37     |
| <i>F. graminearum</i>             | 18.75    |
| <i>F. lateritium</i> <sup>a</sup> | 200      |
| <i>F. oxysporum</i>               | 18.75    |
| <i>F. proliferatum</i>            | 9.37     |
| <i>F. solani</i>                  | 18.75    |
| <i>F. verticillioides</i>         | 18.75    |

<sup>a</sup> EDTANa<sub>2</sub> had no fungicidal activity in the range of 4.69-150 mM. The experiment was replicated three times.

**Table S2.** Strains used in this study.

| Strain                 | Species                      | Description                                                                                 |
|------------------------|------------------------------|---------------------------------------------------------------------------------------------|
| 2021                   | <i>Fusarium asiaticum</i>    | Isolated from a field experiencing Fusarium head blight epidemic in Jiangsu Province, China |
| PH-1                   | <i>Fusarium graminearum</i>  | <i>Fusarium</i> reference strain PH-1                                                       |
| <i>F. acuminatum</i>   | <i>Fusarium acuminatum</i>   | Isolated from a field experiencing soybean Fusarium Root Rot in Liaoning Province, China    |
| <i>F. avenaceum</i>    | <i>Fusarium avenaceum</i>    | Isolated from a root of naked barley in Gansu Province, China                               |
| <i>F. concentricum</i> | <i>Fusarium concentricum</i> | Provided by Shanghai Academy of Agricultural Sciences                                       |
| <i>F. culmorum</i>     | <i>Fusarium culmorum</i>     | Provided by Shanghai Academy of Agricultural Sciences                                       |
| <i>F. equiseti</i>     | <i>Fusarium equiseti</i>     | Isolated from alfalfa root rot disease suspected samples in Neimenggu Province, China       |
| <i>F. fujikuroi</i>    | <i>Fusarium fujikuroi</i>    | Isolated from a field experiencing rice bakanae disease in Jiangsu Province, China          |

|                           |                                 |                                                                                          |
|---------------------------|---------------------------------|------------------------------------------------------------------------------------------|
| <i>F. lateritium</i>      | <i>Fusarium lateritium</i>      | Isolated from alfalfa root rot disease suspected samples in Neimenggu Province, China    |
| <i>F. oxysporum</i>       | <i>Fusarium oxysporum</i>       | Isolated from alfalfa root rot disease suspected samples in Neimenggu Province, China    |
| <i>F. proliferatum</i>    | <i>Fusarium proliferatum</i>    | Isolated from a field experiencing rice bakanae disease in Jiangsu Province, China       |
| <i>F. solani</i>          | <i>Fusarium solani</i>          | Isolated from a field experiencing soybean Fusarium Root Rot in Liaoning Province, China |
| <i>F. verticillioides</i> | <i>Fusarium verticillioides</i> | Provided by Shanghai Academy of Agricultural Sciences                                    |

Table S3. Primers used in *TRI* genes qPCR.

| Primers                         | Sequences              |
|---------------------------------|------------------------|
| FGSG_00071 ( <i>Tri1</i> ) P1   | GAAGATTCCTGAAGGTCCCG   |
| FGSG_00071 ( <i>Tri1</i> )P2    | TGTACCAATTCCAATCGCAGAC |
| FGSG_02343 ( <i>Tri12</i> ) P1  | ATCCCCGCAGTCATTCAGA    |
| FGSG_02343 ( <i>Tri12</i> ) P2  | CGCAATCATAGCCACTACACC  |
| FGSG_03532 ( <i>Tri8</i> ) P1   | ATTTACCAAGCTATCCACGACG |
| FGSG_03532 ( <i>Tri8</i> ) P2   | CACTGAAAAGCCGCCTCAT    |
| FGSG_03534 ( <i>Tri3</i> ) P1   | ACGGTGTCAACGAACGCTT    |
| FGSG_03534 ( <i>Tri3</i> ) P2   | TCCAGTCGGATTGCCAGATA   |
| FGSG_03535 ( <i>Tri4</i> )P1    | ATGGCCTTTGCTGAGATGTACC |
| FGSG_03535 ( <i>Tri4</i> )P2    | CCAACAATACGGGCGTGAGT   |
| FGSG_03536 ( <i>Tri6</i> ) P1   | ACCGTGCTCGGCATGAGT     |
| FGSG_03536 ( <i>Tri6</i> ) P2   | TCCACCCTGCTAAAGACCCT   |
| FGSG_03537 ( <i>Tri5</i> )P1    | AGCTCACCCAGGAAACCCT    |
| FGSG_03537 ( <i>Tri5</i> )P2    | CACTCAATCGTGTCCATCACC  |
| FGSG_03538 ( <i>Tri10</i> ) P1  | TGGGCTCGACAAGACATTT    |
| FGSG_03538 ( <i>Tri10</i> ) P2  | CCATCCCTCAACCAAGACA    |
| FGSG_03540 ( <i>Tri11</i> ) P1  | TTCACCCGACCAAACGACT    |
| FGSG_03540 ( <i>Tri11</i> ) P2  | TCTGCGTAGGCAAGGTTTCAT  |
| FGSG_07896 ( <i>Tri101</i> ) P1 | CGCCAGCGAACAAGAGGT     |
| FGSG_07896 ( <i>Tri101</i> ) P2 | AAAGTCGTAATCCCAGAGTCCC |
| TubulinP1                       | CGTCCAGAGCAAGAACTCATCA |
| TubulinP2                       | TGCGTCGGAACATAGCAGTAA  |

|                                                                     | Query Cover                                                                         | E value | Per. Identity | Accession |            |
|---------------------------------------------------------------------|-------------------------------------------------------------------------------------|---------|---------------|-----------|------------|
| <i>F. acuminatum</i> -VS- <i>F. acuminatum</i> isolate SYQ2         | 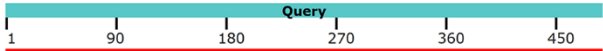   | 100%    | 0.0           | 100.00%   | MT649858.1 |
| <i>F. avenaceum</i> -VS- <i>F. avenaceum</i> strain ZMXR13          |    | 95%     | 0.0           | 99.27%    | MT446118.1 |
| <i>F. concentricum</i> -VS- <i>F. fujikuroi</i> isolate GX12        |    | 96%     | 0.0           | 99.63%    | KJ000433.1 |
| <i>F. culmonum</i> -VS- <i>F. culmonum</i> isolate F3-3-19          |    | 99%     | 0.0           | 98.73%    | KX349468.1 |
| <i>F. equiseti</i> -VS- <i>F. equiseti</i> isolate USM3-2A          |    | 99%     | 0.0           | 99.09%    | KM111481.1 |
| <i>F. fujikuroi</i> -VS- <i>F. fujikuroi</i> isolate GX12           |    | 98%     | 0.0           | 99.27%    | KJ000433.1 |
| <i>F. lateritium</i> -VS- <i>F. lateritium</i> strain ZMT01         |   | 97%     | 0.0           | 99.45%    | MT875260.1 |
| <i>F. oxysporum</i> -VS- <i>F. oxysporum</i> strain WZ-198          |  | 99%     | 0.0           | 99.27%    | MN856331.1 |
| <i>F. proliferatum</i> -VS- <i>F. proliferatum</i> strain BCD       |  | 97%     | 0.0           | 99.81%    | KU939074.1 |
| <i>F. solani</i> -VS- <i>F. solani</i> isolate TS08-95-3            |  | 95%     | 0.0           | 99.09%    | AB470848.1 |
| <i>F. verticillioides</i> -VS- <i>F. verticillioides</i> isolate Q2 |  | 96%     | 0.0           | 99.26%    | MN698249.1 |

**Figure S1.** Internal transcribed spacer (ITS) sequences alignment of *Fusarium* isolates used in this study. ITS sequences of different strains were amplified using primers ITS-F/ITS-R (ITS-F: TCCGTAGGTGAACCTGCGG, ITS-R: TCCTCCGCTTATTGATATGC). Sequences alignment was performed using NCBI Blastn (<https://blast.ncbi.nlm.nih.gov/Blast.cgi>) with default parameters.
